# Supplementary material
Source: PubMed Central journal article supplement (PMC5076513)
Supplement: 10.1074_M116.739482_jbc.M116.739482-1.pdf [file 10.1074_M116.739482_jbc.M116.739482-1.pdf]

## **SUPPLEMENTAL DATA**

### **Supplemental Figure S1**

Identification of the m.14692A>G mutation in the mitochondrial tRNA<sup>Glu</sup> gene.

### **Supplemental Figure S2**

Three Han Chinese pedigrees with diabetes and deafness.

### **Supplemental Figure S3**

The analysis of the stability of tRNA<sup>Glu</sup>.

### **Supplemental Table S1**

mtDNA variants in the 3 Chinese pedigrees carrying the m.14692A>G mutation.

### **Supplemental Table S2**

Summary of clinical and biochemical data of matrilineal relatives in three Chinese pedigrees with deafness and diabetes

### **Supplemental Table S3**

Relationship between the decrease level of mitochondrial proteins and the number or proportion of glutamic acid codons.

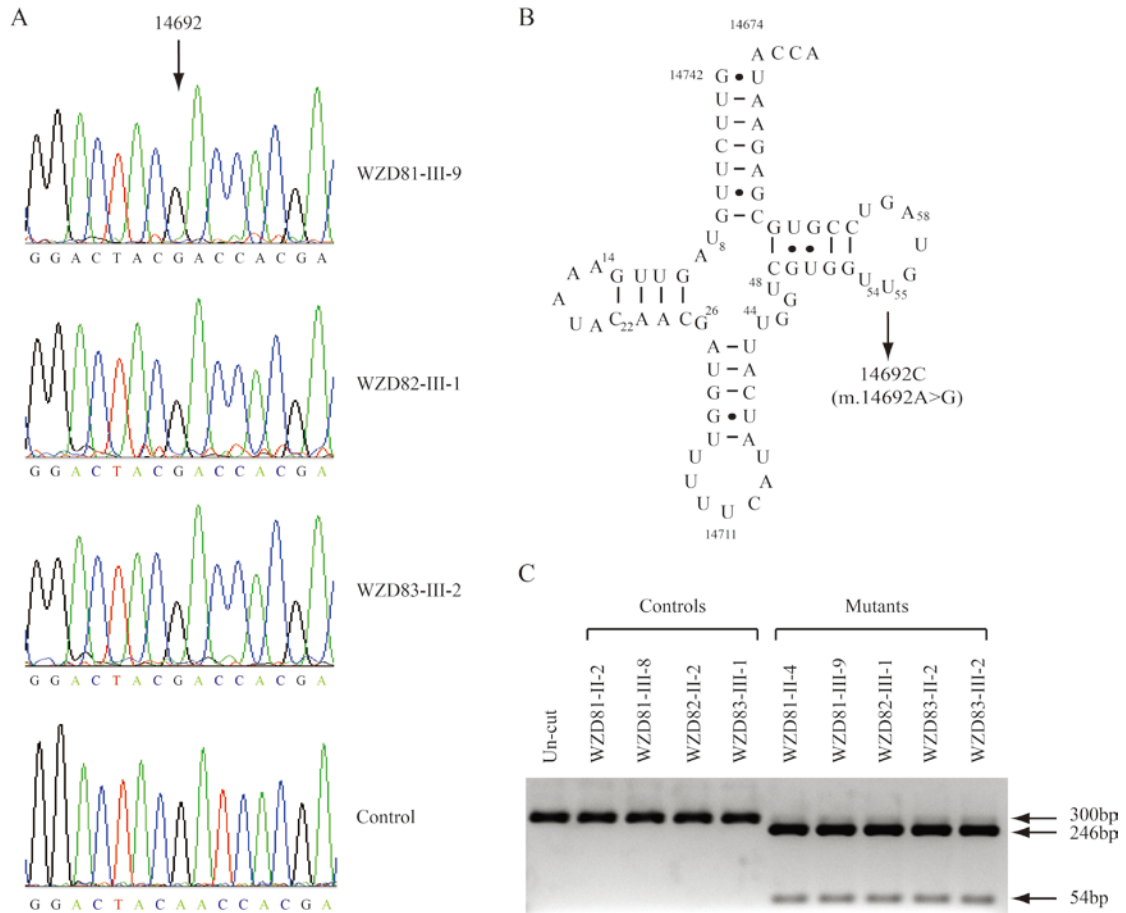

**SupplementalFigure S1.** Identification of the m.14692A>G mutation in the mitochondrial tRNA<sup>Glu</sup> gene. (A) Partial sequence of the tRNA<sup>Glu</sup> gene from three affected individuals (WZD81-III-9, WZD82-III-1, WZD83-III-2) and a control subjects, respectively. The arrow indicates the location of the base change at position 14692. (B) The location of the m.14692A>G mutation in human mitochondrial tRNA<sup>Glu</sup>. Cloverleaf structure of human mitochondrial tRNA<sup>Glu</sup> was derived from Florentz et al. (28). (C) Quantification of the m.14692A>G mutation in five hearing-impaired individuals and control subjects. PCR products amplified from whole bloods were digested with *Mbo*I and analyzed by electrophoresis in a 3% agarose gel stained with ethidium bromide.

WZD81

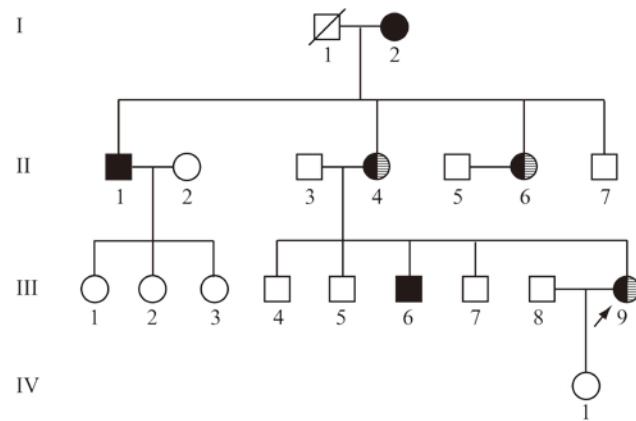

WZD82

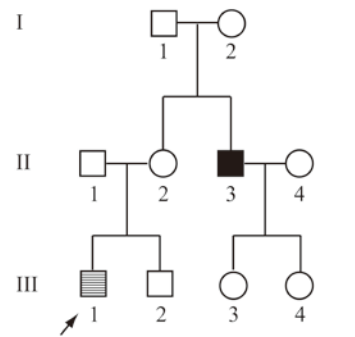

WZD83

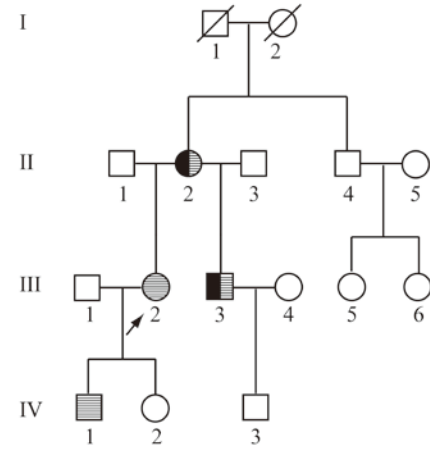

□/○ Normal    ■/● Diabetes    ■/● Diabetes and Deafness    ▨/● Deafness

**SupplementalFigure S2.** Three Han Chinese pedigrees with diabetes and deafness. Affected individuals are indicated by filled symbols.

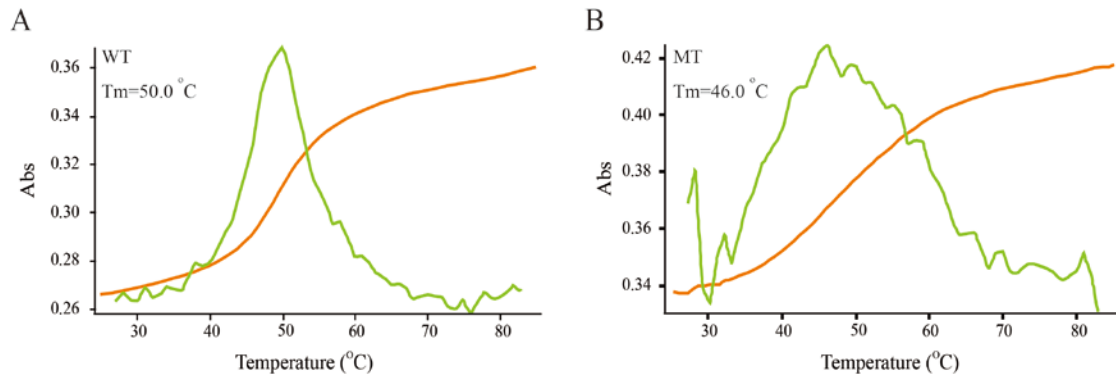

**Supplemental Figure S3.** The analysis of the stability of tRNA<sup>Glu</sup>. Melting profiles of transcripts of (A) wild type tRNA<sup>Glu</sup> and (B) A14692G mutant measured at 260 nm with a heating rate of 1°/min from 25 to 85° (orange curves). First derivative (dA/dT) against temperature curves are shown to highlight the T<sub>m</sub> value transitions (green curves).

**SupplementalTable S1.** mtDNA variants in the 3 Chinese pedigrees carrying the m.14692A>G mutation

| Gene   | Position    | Replacement | <sup>a</sup> Conservation<br>(H/B/M/X) | <sup>b</sup> CRS | WZD81 | WZD82 | WZD83 | C3  | C4 | <sup>c</sup> Previously reported |     |
|--------|-------------|-------------|----------------------------------------|------------------|-------|-------|-------|-----|----|----------------------------------|-----|
| D-loop | 73          | A to G      |                                        | A                | G     | G     | G     | G   | G  | Yes                              |     |
|        | 146         | T to C      |                                        | T                | C     | C     | C     |     |    | Yes                              |     |
|        | 150         | C to T      |                                        | C                | T     |       |       |     | T  | Yes                              |     |
|        | 210         | A to G      |                                        | A                |       |       |       | G   |    | Yes                              |     |
|        | 227         | A to T      |                                        | A                |       |       |       | T   |    | Yes                              |     |
|        | 263         | A to G      |                                        | A                | G     | G     | G     | G   | G  | Yes                              |     |
|        | 310         | T to TC     |                                        | T                | TC    | TC    | TC    | CTC | TC | Yes                              |     |
|        | 489         | T to C      |                                        | T                | C     | C     | C     |     |    | Yes                              |     |
|        | 16136       | T to C      |                                        | T                |       |       |       |     | C  | Yes                              |     |
|        | 16140       | T to C      |                                        | T                | C     |       |       | C   | C  | Yes                              |     |
|        | 16182:16183 | AA to CC    |                                        | AA               | CC    |       |       |     | AC | Yes                              |     |
|        | 16189       | T to C      |                                        | T                | C     |       |       | C   | C  | Yes                              |     |
|        | 16193       | C to CC     |                                        | C                |       |       |       |     | CC | Yes                              |     |
|        | 16217       | T to C      |                                        | T                |       |       |       |     | C  | Yes                              |     |
|        | 16223       | C to T      |                                        | C                |       | T     | T     |     |    | Yes                              |     |
|        | 16224       | T to C      |                                        | T                |       | C     | C     |     |    | Yes                              |     |
|        | 16245       | C to T      |                                        | C                |       | T     | T     |     |    | Yes                              |     |
|        | 16249       | T to C      |                                        | T                |       |       |       |     | C  | Yes                              |     |
|        | 16266       | C to G      |                                        | C                |       |       |       | G   |    | Yes                              |     |
|        | 16274       | G to A      |                                        | G                |       |       |       |     | A  | Yes                              |     |
|        | 16291       | C to T      |                                        | C                |       |       |       |     | T  | Yes                              |     |
|        | 16292       | C to T      |                                        | C                |       | T     | T     |     |    | Yes                              |     |
|        | 16362       | T to C      |                                        | T                |       |       |       | C   |    | Yes                              |     |
|        | 16365       | C to T      |                                        | C                |       | T     |       |     |    | Yes                              |     |
|        | 16519       | T to C      |                                        | T                |       | C     | C     | C   | C  | Yes                              |     |
|        | 12S rRNA    | 709         | G to A                                 | G/A/A/-          | G     | A     |       |     | A  | A                                | Yes |
|        |             | 750         | A to G                                 | A/A/A/-          | A     | G     | G     | G   | G  | G                                | Yes |

|            |           |                  |         |           |   |   |   |     |     |     |
|------------|-----------|------------------|---------|-----------|---|---|---|-----|-----|-----|
|            | 856       | A to G           | A/A/A/A | A         |   | G | G |     |     | Yes |
|            | 1119      | T to C           | T/T/T/- | T         | C |   |   |     | C   | Yes |
|            | 1438      | A to G           | A/A/A/G | A         | G | G | G | G   | G   | Yes |
| 16S rRNA   | 2483      | T to C           | T/C/C/C | T         |   |   |   |     | C   | Yes |
|            | 2706      | A to G           | A/G/A/A | A         | G | G | G | G   | G   | Yes |
|            | 2766      | C to T           | C/T/T/T | C         |   | T | T |     |     | Yes |
|            | 3010      | G to A           | G/G/A/A | G         |   | A | A |     |     | Yes |
|            | 3107      | N to del         | N/T/T/T | N         |   |   |   |     | del | Yes |
| ND1        | 3398      | T to C (Met-Thr) | M/M/M/M | T         |   | C |   |     |     | Yes |
|            | 3435      | C to T (syn)     | Y/Y/Y/T | C         |   |   |   |     | T   | Yes |
|            | 3497      | C to T (Ala-Val) | A/A/L/S | C         | T |   |   |     | T   | Yes |
|            | 3537      | A to G (syn)     | L/M/L/M | A         |   |   |   | G   |     | Yes |
|            | 3571      | C to T (Leu-Phe) | L/L/L/L | C         |   |   |   |     | T   | Yes |
| ND2        | 4625      | C to T (syn)     | S/A/S/A | C         | T |   |   |     |     | Yes |
|            | 4704      | A to C (Met-Leu) | M/M/K/W | A         | C |   |   |     |     | Yes |
|            | 4769      | A to G (syn)     | M/M/M/I | A         | G | G | G |     | G   | Yes |
|            | 4883      | C to T (syn)     | P/P/P/P | C         |   | T | T |     |     | Yes |
|            | 5178      | C to A (Leu-Met) | L/T/T/T | C         |   | A | A |     |     | Yes |
|            | 5178      | C to G (Leu-Val) | L/T/T/T |           |   |   |   | G   |     | No  |
| CO1        | 6663      | A to G (Ile-Val) | I/I/I   | A         |   |   |   |     | G   | Yes |
|            | 7028      | C to T (syn)     | A/A/A/A | C         | T | T | T | T   | T   | Yes |
| Non-coding | 8281-8289 | 9bp-del          |         | CCCCCTCTA |   |   |   | del | del | Yes |
| ATP8       | 8414      | C to T (Leu-Phe) | L/F/M/W | C         |   | T | T |     |     | Yes |
| ATP6       | 8584      | G to A (Ala-Thr) | A/V/V/I | G         |   |   |   | A   |     | Yes |
|            | 8701      | A to G (Thr-Ala) | T/S/L/Q | A         |   | G | G |     |     | Yes |
|            | 8860      | A to G (Thr-Ala) | T/A/A/T | A         | G | G | G | G   | G   | Yes |
|            | 8902      | G to A (Ala-Thr) | A/A/A/G | G         |   |   |   | A   |     | Yes |
|            | 9100      | A to G (Ile-Val) | I/T/T/T | A         |   |   |   | G   |     | Yes |
|            | 9128      | T to C (Ile-Thr) | I/I/L   | T         |   |   |   |     | C   | Yes |
| CO3        | 9540      | T to C (syn)     | L/L/L/L | T         |   | C | C |     |     | Yes |

|                     |       |                  |         |   |   |   |   |   |   |     |
|---------------------|-------|------------------|---------|---|---|---|---|---|---|-----|
|                     | 9575  | G to A (syn)     | P/P/P/P | G |   |   |   |   | A | Yes |
|                     | 9950  | T to C (syn)     | V/V/V/V | T |   |   |   | C |   | Yes |
| ND3                 | 10398 | A to G (Thr-Ala) | T/T/T/A | A |   | G | G | G |   | Yes |
|                     | 10400 | C to T (syn)     | T/T/T/A | C |   | T | T |   |   | Yes |
| ND4L                | 10493 | T to C (syn)     | I/I/L/F | T |   |   |   |   | C | Yes |
| ND4                 | 10873 | T to C (syn)     | P/S/S/S | T |   | C | C |   |   | Yes |
|                     | 11440 | G to A (syn)     | G/G/G/G | G |   |   |   |   | A | Yes |
|                     | 11719 | G to A (syn)     | G/G/G/G | G | A | A | A | A | A | Yes |
| ND5                 | 12705 | C to T (syn)     | I/L/L/T | C |   | T | T |   |   | Yes |
|                     | 12853 | C to T (syn)     | L/L/L/I | C | T |   |   |   |   | Yes |
|                     | 13437 | T to C (syn)     | P/P/P/P | T | C |   |   |   |   | Yes |
| ND6                 | 14668 | C to T (syn)     | M/L/N/I | C |   | T | T |   |   | Yes |
| tRNA <sup>Glu</sup> | 14692 | A to G           | A/A/A/A | A | G | G | G |   |   | Yes |
| CytB                | 14766 | C to T (Thr-Ile) | T/S/T/S | C | T | T | T | T | T | Yes |
|                     | 14783 | T to C (syn)     | L/I/I/I | T |   | C | C |   |   | Yes |
|                     | 15043 | G to A (syn)     | G/G/G/G | G |   | A | A |   |   | Yes |
|                     | 15077 | G to A (Glu-Lys) | E/E/E/E | G |   |   |   | A |   | Yes |
|                     | 15235 | A to G (syn)     | W/W/W/W | A |   |   |   | G |   | Yes |
|                     | 15263 | C to T (Pro-Ser) | P/A/A/A | C |   |   |   | T |   | Yes |
|                     | 15301 | G to A (syn)     | L/L/L/L | G |   | A | A |   |   | Yes |
|                     | 15326 | A to G (Thr-Ala) | T/M/I/I | A | G | G | G | G | G | Yes |
|                     | 15346 | G to A (syn)     | L/L/L/L | G |   |   |   |   | A | Yes |
|                     | 15777 | G to A (Ser-Asn) | S/E/E/E | G |   |   |   | A |   | Yes |

<sup>a</sup> Conservation of amino acid for polypeptides in human (H), bovine (B), mouse (M), and *Xenopus* (X).

<sup>b</sup> CRS: Cambridge reference sequence.

<sup>c</sup> See the online mitochondrial genome database MITOMAP.

**Supplemental Table S2.** Summary of clinical and biochemical data of matrilineal relatives in three Chinese pedigrees with deafness and diabetes

| Subjects    | Gender | Age<br>test/onset<br>diabetes | at<br>(yrs) | Fasting<br>glucose<br>(mmol/L) | Oral<br>glucose<br>tolerance<br>or mg/dL | HbA1c (%) | Age<br>test/onset<br>deafness | at<br>(yrs) | PTA<br>right/left ear | (dB) | Level<br>of<br>hearing<br>impairment |
|-------------|--------|-------------------------------|-------------|--------------------------------|------------------------------------------|-----------|-------------------------------|-------------|-----------------------|------|--------------------------------------|
| WZD81-I-2   | F      | 78/72                         |             | 10.0                           | 1.42 (278)                               | 6.9       | 72/-                          |             | 23/28                 |      | Normal                               |
| WZD81-II-1  | M      | 72/68                         |             | 16.1                           | 1.78 (300)                               | 7.6       | 72/-                          |             | 24/25                 |      | Normal                               |
| WZD81-II-4  | F      | 74/72                         |             | 15.8                           | 1.73 (298)                               | 7.4       | 74/28                         |             | 80/85                 |      | Severe                               |
| WZD81-II-6  | F      | 68/67                         |             | 15.2                           | 1.68 (288)                               | 7.3       | 68/26                         |             | 95/90                 |      | Profound                             |
| WZD81-II-7  | M      | 66/-                          |             | 5.5                            | 0.82 (149)                               | 5.4       | 66/-                          |             | 20/25                 |      | Normal                               |
| WZD81-III-4 | M      | 58/-                          |             | 6.8                            | 0.94 (169)                               | 6.2       | 58/-                          |             | 21/26                 |      | Normal                               |
| WZD81-III-5 | M      | 56/-                          |             | 4.8                            | 0.73 (128)                               | 5.4       | 56/-                          |             | 29/22                 |      | Normal                               |
| WZD81-III-6 | M      | 45/44                         |             | 14.5                           | 1.43 (246)                               | 7.2       | 45/-                          |             | 14/24                 |      | Normal                               |
| WZD81-III-7 | M      | 44/-                          |             | 5.6                            | 0.88 (162)                               | 5.9       | 44/-                          |             | 23/20                 |      | Normal                               |
| WZD81-III-9 | F      | 44/42                         |             | 7.8                            | 1.36 (268)                               | 6.8       | 44/20                         |             | 77/79                 |      | Normal                               |
| WZD81-IV-1  | F      | 20/-                          |             | 5.6                            | 0.77 (139)                               | 5.0       | 20/-                          |             | 23/16                 |      | Normal                               |
| WZD82-I-2   | F      | 72/-                          |             | 6.4                            | 0.94 (182)                               | 5.6       | 72/-                          |             | 24/26                 |      | Normal                               |
| WZD82-II-2  | F      | 52/-                          |             | 5.8                            | 0.81 (145)                               | 5.5       | 52/-                          |             | 22/25                 |      | Normal                               |
| WZD82-II-3  | M      | 50/50                         |             | 7.2                            | 1.14 (210)                               | 6.6       | 50/-                          |             | 23/27                 |      | Normal                               |
| WZD82-III-1 | M      | 26/-                          |             | 5.3                            | 0.76 (136)                               | 5.7       | 26/26                         |             | 75/78                 |      | Severe                               |
| WZD82-III-2 | M      | 24/-                          |             | 5.6                            | 0.77 (138)                               | 5.3       | 24/-                          |             | 28/17                 |      | Normal                               |
| WZD83-II-2  | F      | 64/60                         |             | 11.4                           | 1.43 (250)                               | 7.3       | 64/22                         |             | 82/88                 |      | Severe                               |
| WZD83-II-4  | M      | 60/-                          |             | 6.5                            | 0.94 (178)                               | 6.1       | 60/-                          |             | 21/26                 |      | Normal                               |
| WZD83-III-2 | F      | 40/-                          |             | 5.8                            | 0.90 (170)                               | 6.0       | 40/16                         |             | 70/86                 |      | Severe                               |
| WZD83-III-3 | M      | 40/40                         |             | 7.1                            | 1.18 (220)                               | 6.8       | 40/20                         |             | 65/70                 |      | Moderate                             |
| WZD83-IV-1  | M      | 18/-                          |             | 5.5                            | 0.77 (140)                               | 5.5       | 18/18                         |             | 56/67                 |      | Moderate                             |
| WZD83-IV-2  | F      | 16/-                          |             | 5.3                            | 0.72 (139)                               | 5.0       | 16/-                          |             | 20/23                 |      | Normal                               |

Glycated hemoglobin: HbA1c; pure-tone audiometry: PTA; Decibel: dB.



**Supplemental Table S3.** Relationship between the decrease level of mitochondrial proteins and the number or proportion of glutamic acid codons

|      | Number of amino acids | Number of glutamic acid codons | Proportion of glutamic acid codons (%) | Decrease level of mitochondrial proteins (%) |
|------|-----------------------|--------------------------------|----------------------------------------|----------------------------------------------|
| ATP6 | 227                   | 3                              | 1.3                                    | 20.4                                         |
| CO2  | 225                   | 11                             | 4.8                                    | 66.2                                         |
| ND4  | 459                   | 9                              | 2                                      | 20.1                                         |
| ND1  | 318                   | 11                             | 3.5                                    | 51.7                                         |
| ND5  | 604                   | 9                              | 1.5                                    | 30.0                                         |
| ND6  | 175                   | 10                             | 5.7                                    | 33.9                                         |
| CYTB | 380                   | 4                              | 1.1                                    | -21.1                                        |
